# Supplementary material
Source: PubMed Central journal article supplement (PMC2808374)
Supplement: emboj2009326s3.pdf [file emboj2009326s3.pdf]

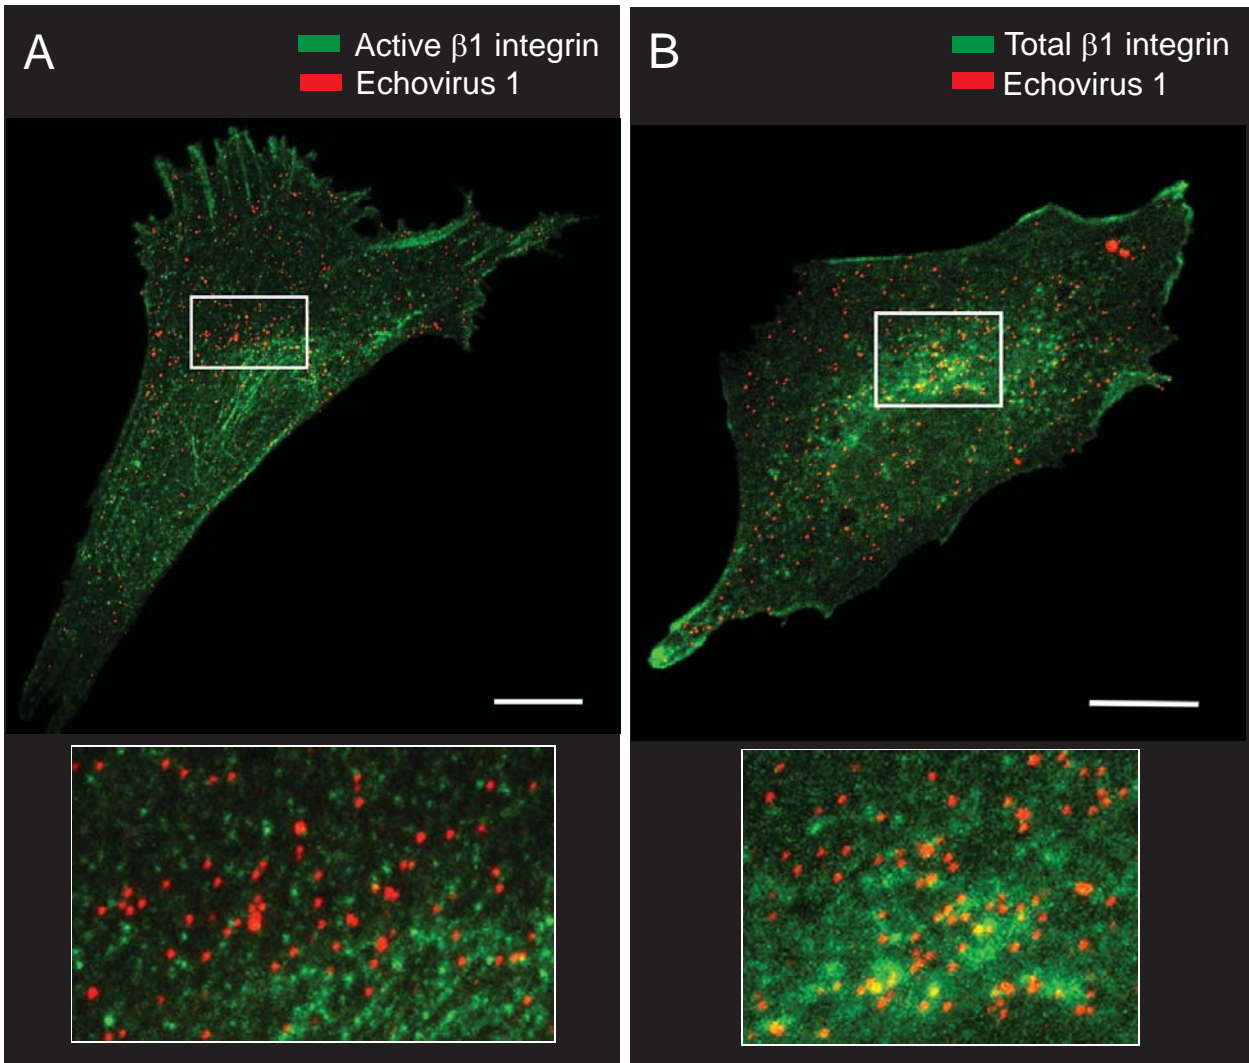

Saos  $\alpha 2$ WT cells were treated with EV1 for 15 min @ 37° C. Paraformaldehyde fixed (4 %) and TritonX-100 (0.2 %) permeabilized cells were stained with EV1 specific antibody (red) together with a conformation-sensitive  $\beta 1$  antibody (A; green; 9EG7, BD Biosciences) or an antibody recognizing total  $\beta 1$  (B; green; sc-9970, Santa Cruz). While active  $\beta 1$  integrins characterically localized at the cell edges, the EV1 bound to integrins located in cell apices. Blow-ups show a typical EV1 clustering on the top of the cell and its colocalization with total  $\beta 1$  (B), but not with active  $\beta 1$  (A). When the colocalization was quantified further by using BIOMAGEXD software, it appeared that on average 67% of the total intensity of the EV1 stain coincides with the total  $\beta 1$  integrin stain, but only 40% with the active  $\beta 1$  integrin stain, when observing meaningful intensity levels of both channels. Scale bar, 15  $\mu$ M.
